# Supplementary material for: Inhibition of Rac1 attenuated propofol-induced neurotoxicity in the hippocampal dentate gyrus in developing mice
Source: Research Square preprint supplement (doi:10.21203/rs.3.rs-6288169/v1), 2025-04-10
Supplement: Supplementary file 1 [file 21e15c3e05106ba50350dddb.docx]

Supplementary material for

Inhibition of Rac1 attenuated propofol-induced neurotoxicity in the hippocampal dentate gyrus in developing mice

Yuan Lia,b†, Haifeng Duanc†, Qi Wanga, Yi Lina, Zhoujing Yanga, Zhiru Wangd, Yingwei Wanga, Kai Weia*, Daojie Xua*

aDepartment of Anesthesiology, Huashan Hospital, Fudan University, Shanghai, China.

bDepartment of Anesthesiology, Renmin Hospital, Wuhan University, Hubei, China.

cDepartment of Anesthesiology, Zhongnan Hospital, Wuhan University, Hubei, China.

dKey Laboratory of Brain Functional Genomics-Ministry of Education, School of Life Science, East China Normal University, Shanghai, China

†These authors share first authorship

*Corresponding author:

Kai Wei

Address: Department of Anesthesiology, Huashan Hospital, Fudan University, Shanghai 200040, China. Tel.: 159-2734-5535. E-mail address: [wei-kai-cool@163.com](mailto:wei-kai-cool@163.com). ORCID ID: 0000-0001-9207-5138

Daojie Xu

Address: Department of Anesthesiology, Huashan Hospital, Fudan University, Shanghai 200040, China. Tel.: 159-0178-7886. E-mail address: [xudaojie@fudan.edu.cn](mailto:xudaojie@fudan.edu.cn). ORCID ID: 0009-0007-4341-9062

**
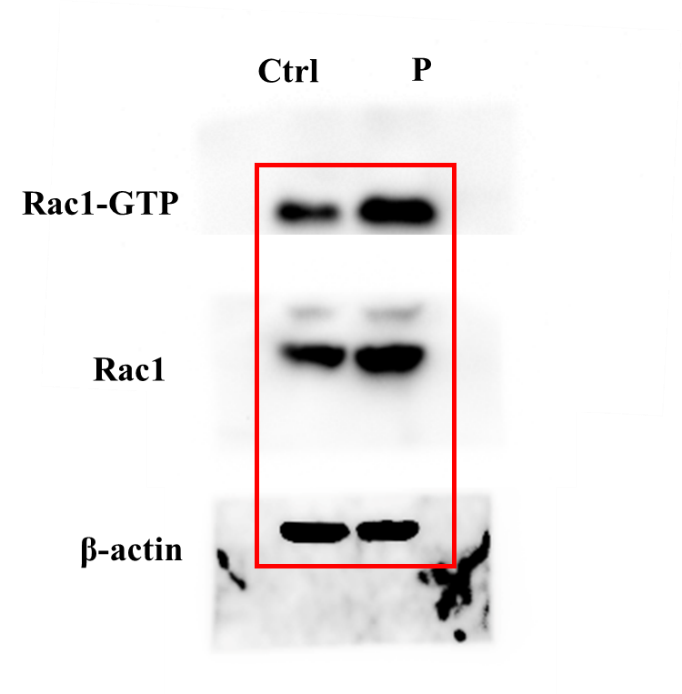
**

**Figure S1**. Full and unprocessed western blot images corresponding to Figure 3A, the square refers to the blots cited in the main article.


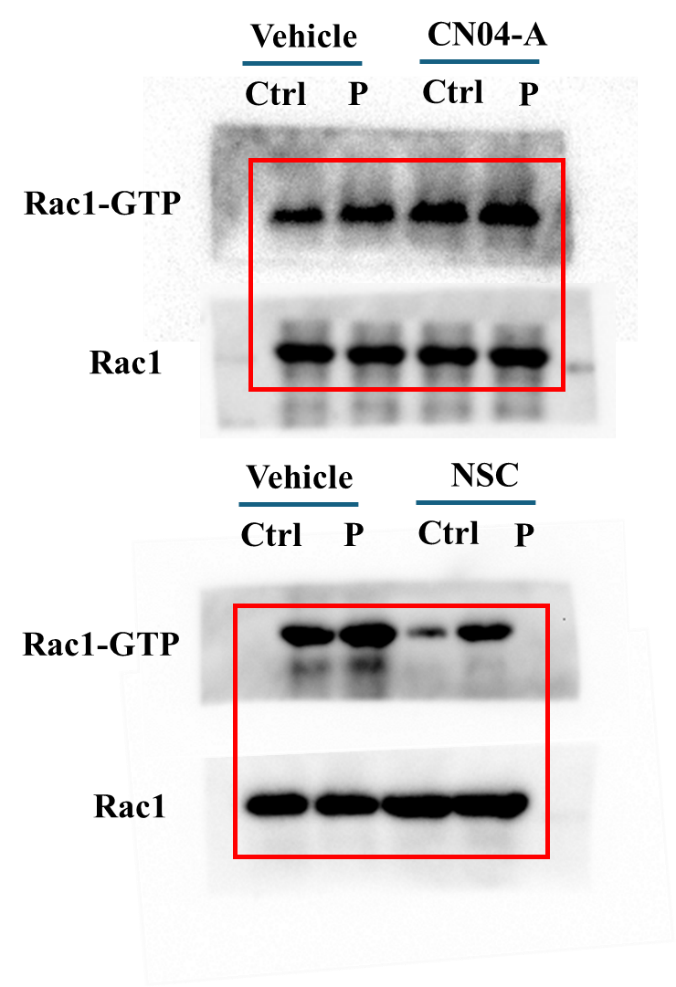


**Figure S2**. Full and unprocessed western blot images corresponding to Figure 4 A, C, the square refers to the blots cited in the main article.


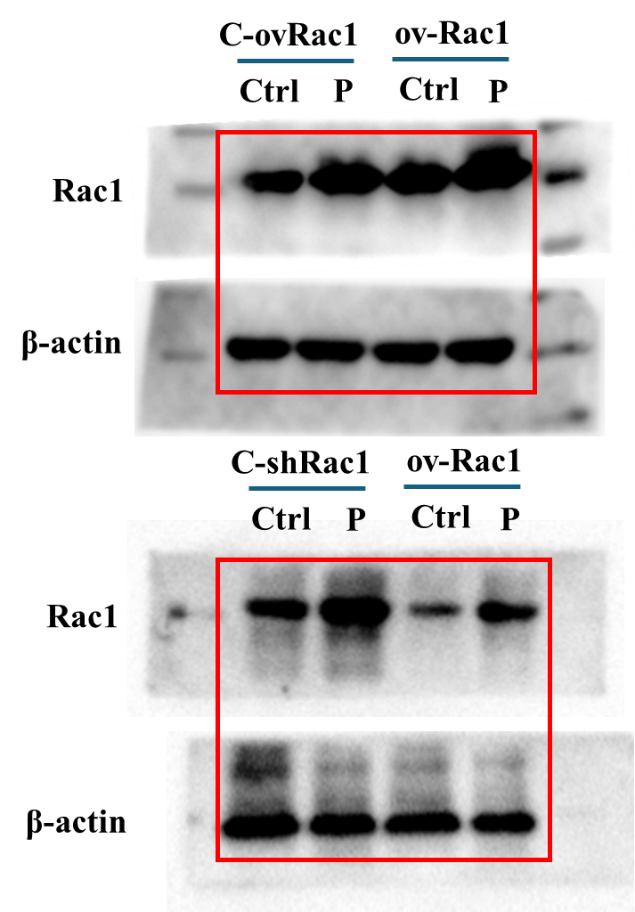


**Figure S3**. Full and unprocessed western blot images corresponding to Figure 5 A, C, the square refers to the blots cited in the main article.


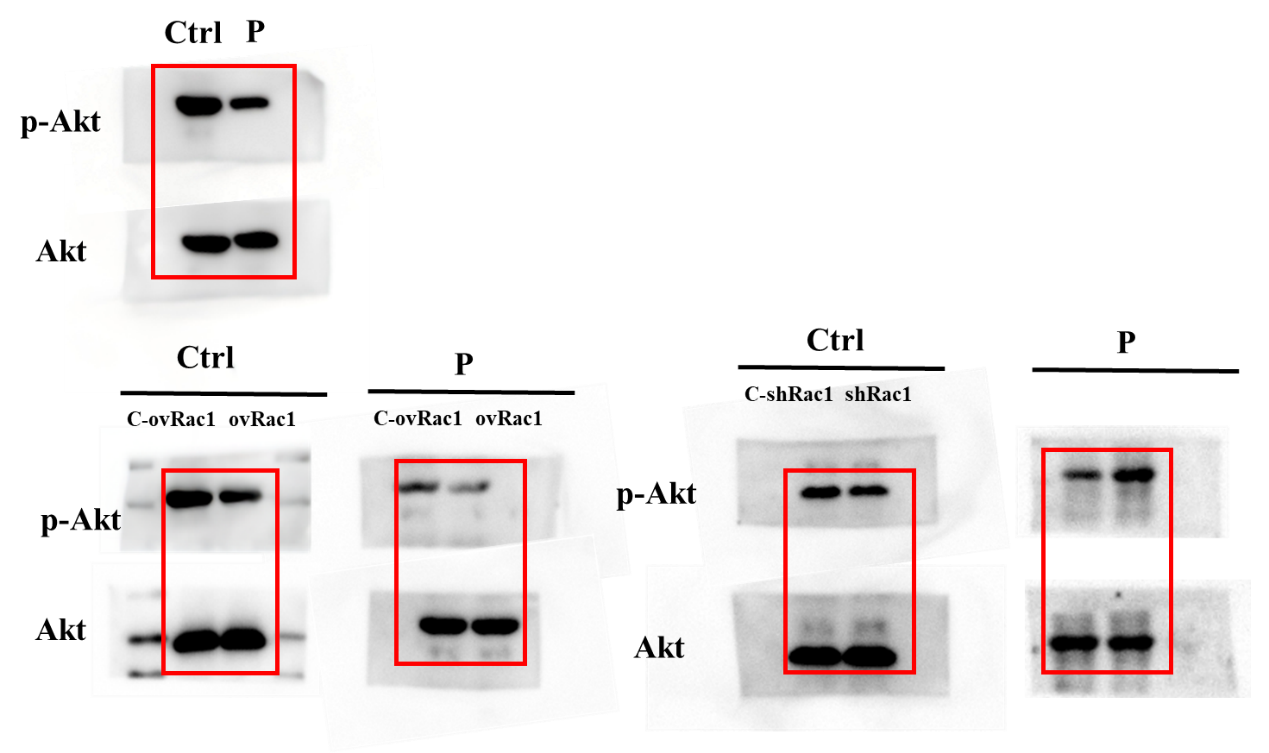


**Figure S4**. Full and unprocessed western blot images corresponding to Figure 7A, C, F. the square refers to the blots cited in the main article.
